# Supplementary material for: Glycosylated modification of MUC1 maybe a new target to promote drug sensitivity and efficacy for breast cancer chemotherapy
Source: PubMed Central journal article supplement (PMC9378678; doi:10.1038/s41419-022-05110-2), 2022-08-16

**Figure 4F**

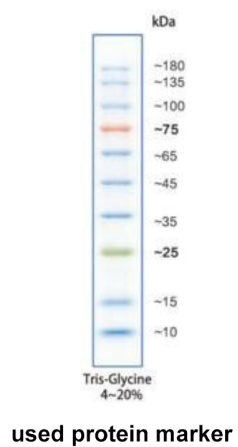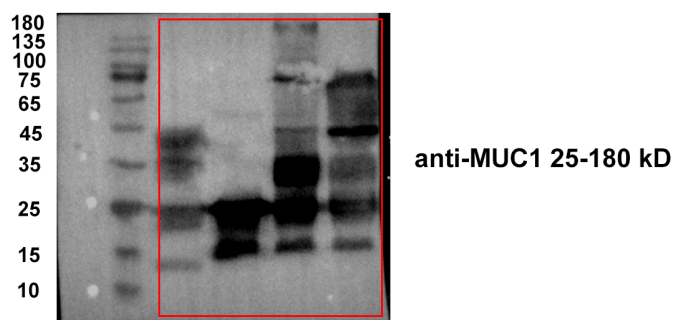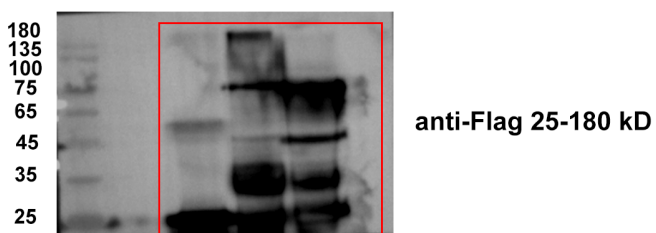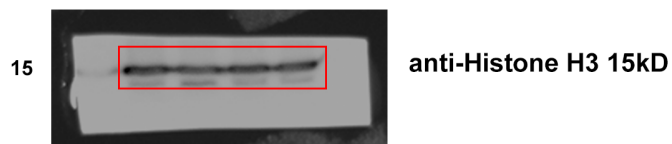

**Figure S2A**

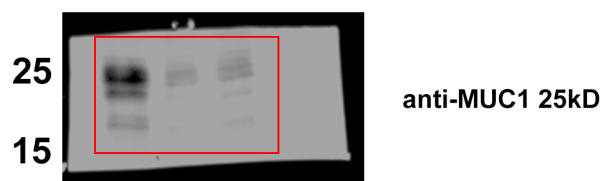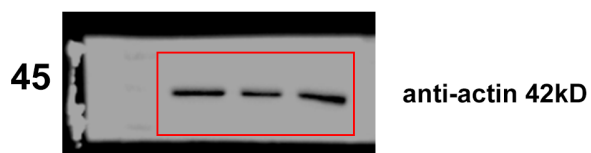

**Figure S2I**

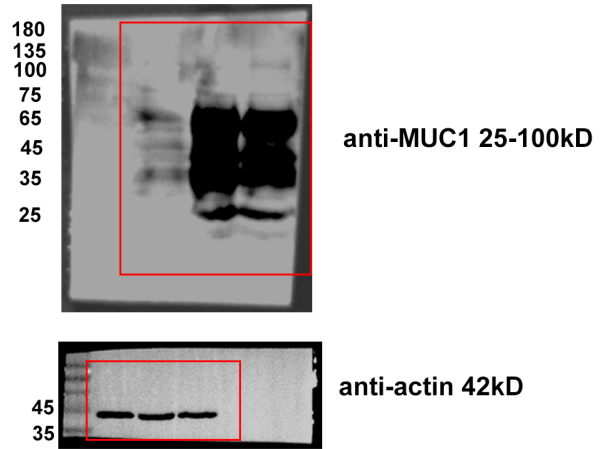

**Figure S2K**

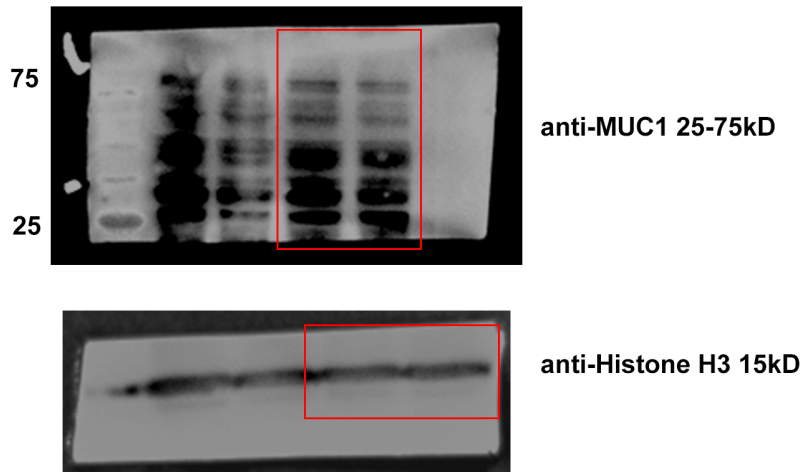

Figure S2L

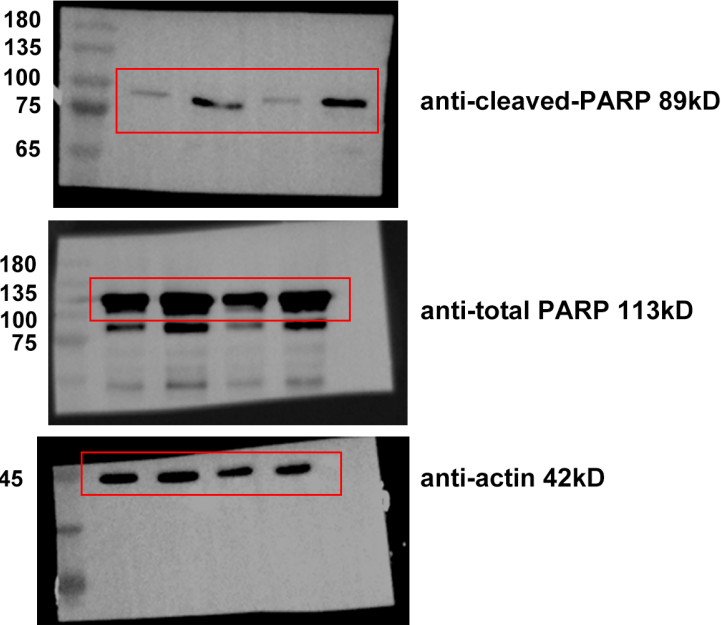

Figure S3A

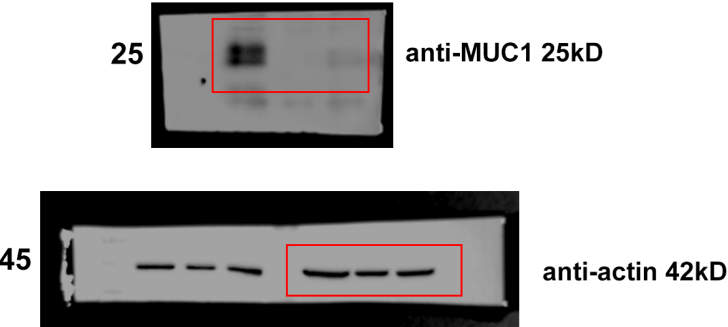

**Figure S6E**

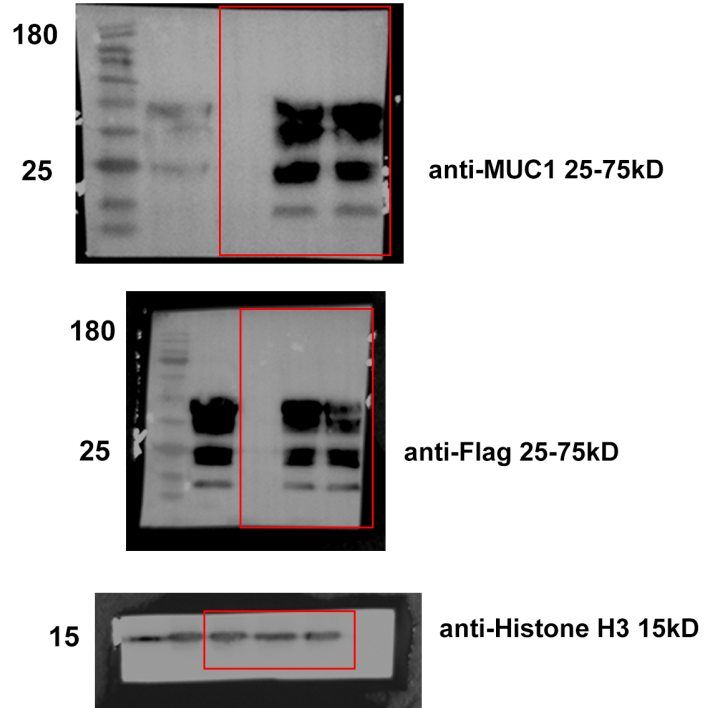

**Figure S7G**

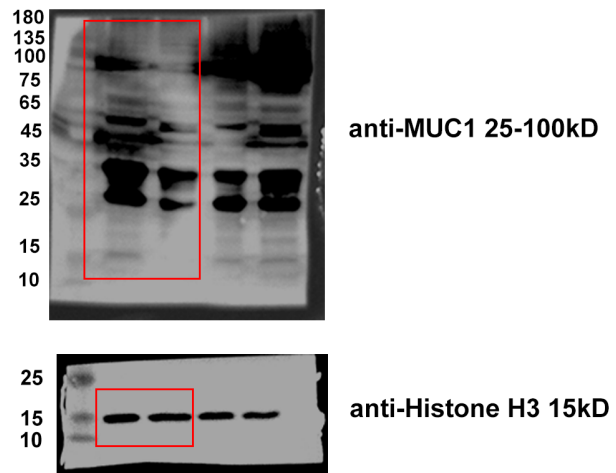

**Figure S7H**

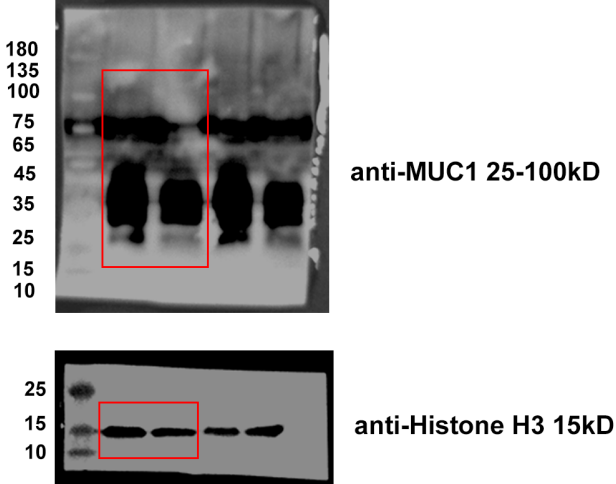

**Figure S7I**

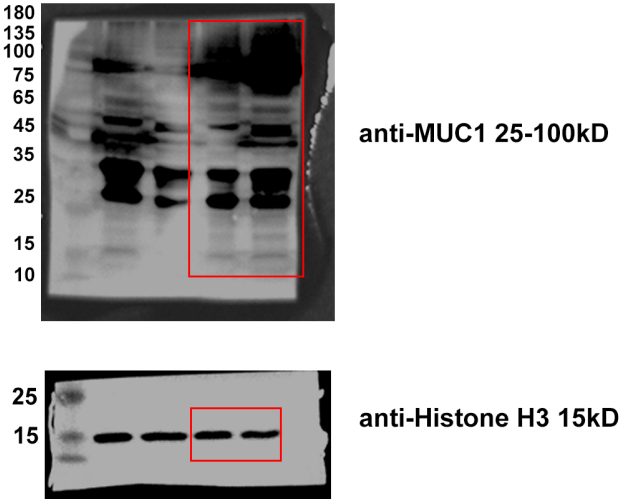

**Figure S7L**

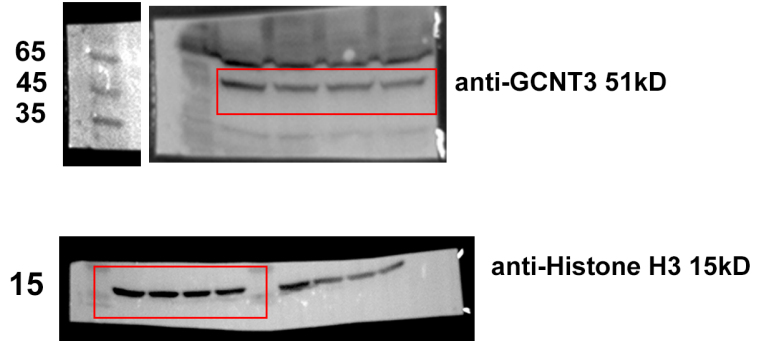

**Figure S7M**

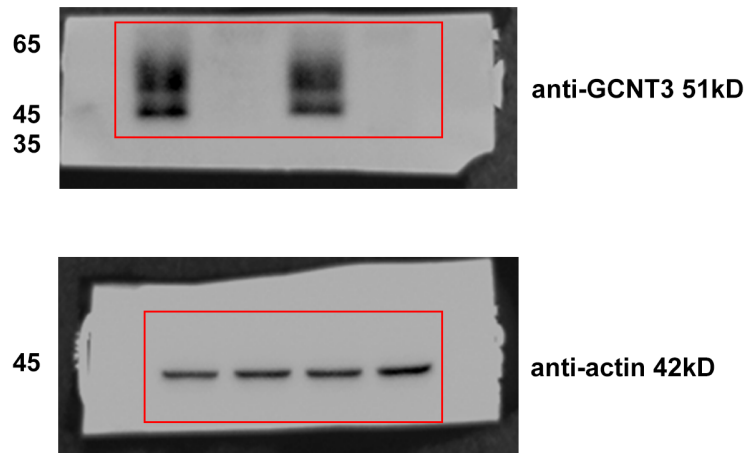

Figure S8E

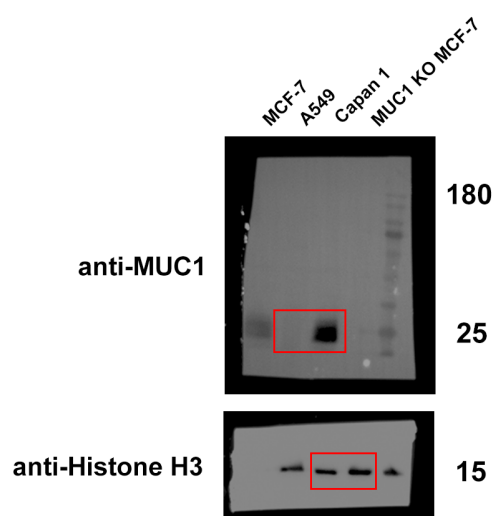

Supplement: 41419_2022_5110_MOESM12_ESM.pdf [file 41419_2022_5110_MOESM12_ESM.pdf]
